# Supplementary material
Source: publisher site journal article supplement (https://www.spandidos-publications.com/3644/downloadSupplementary)

Figure S1. Knockdown of APC in rat PC12 cells. (A) mRNA and (B) protein levels of APC in PC12 cells transfected with shNC and three specific shRNAs against APC. \*\*\*P<0.001 vs. shNC. APC, activated protein C; sh, short hairpin; NC, negative control.

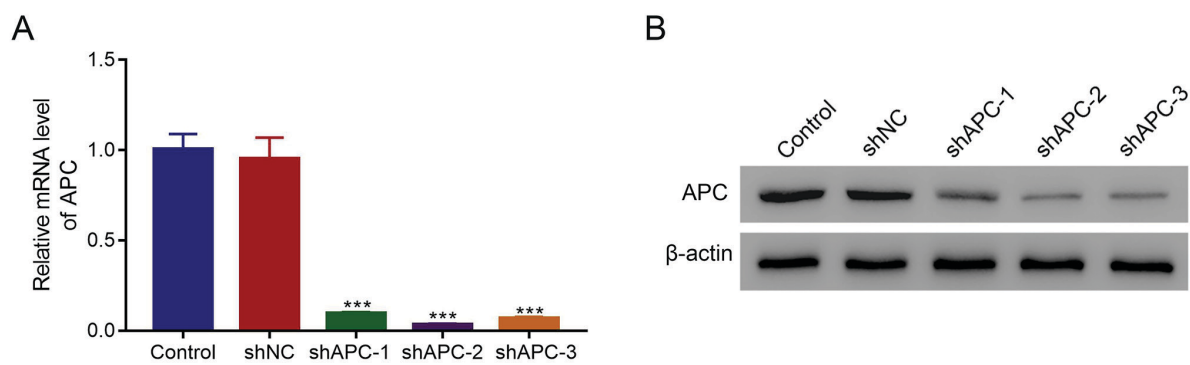

Figure S2. Graphical abstract for the present study. APC, activated protein C; SAH, subarachnoid hemorrhage; NLRP3, NLR family pyrin domain-containing 3.

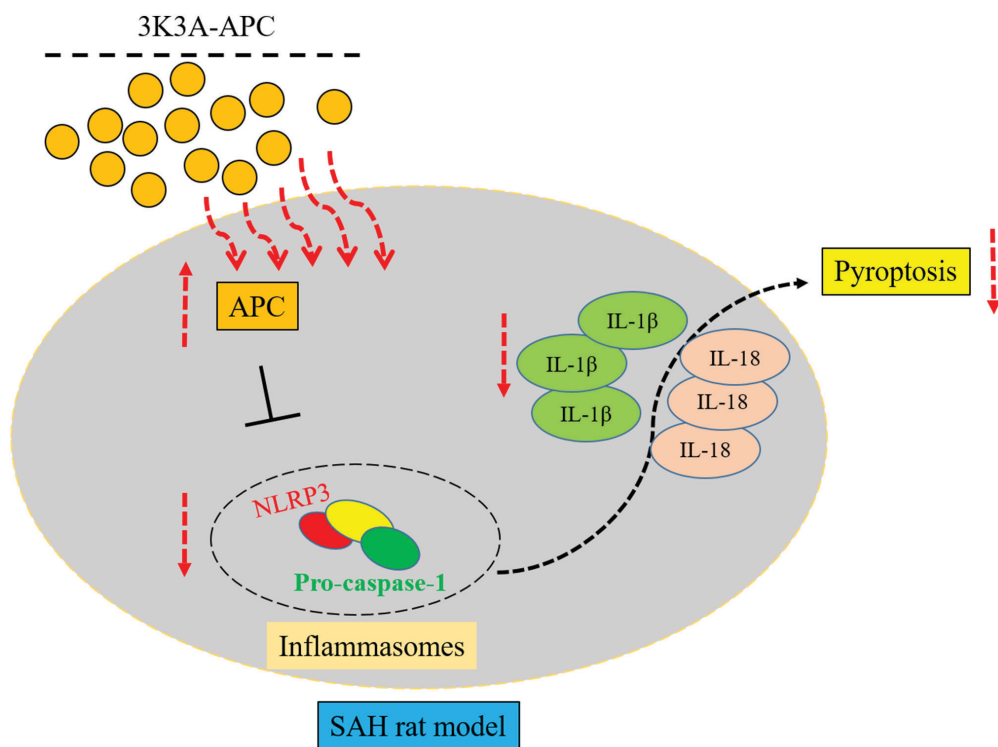

Supplement: Supplementary file 1 [file downloadSupplementary]
